# Supplementary material
Source: publisher site journal article supplement (https://www.spandidos-publications.com/3253/downloadSupplementary)
Supplement: Supplementary file 1 [file downloadSupplementary]

## Sheet: Sheet1
Table SI. List of studies included in the assessment
First author, year	Type of study	Number of patients	Follow-up time	Number of tumor and location of tumor	Treatment	Type of surgery	Number of patients treated	Results	Survival	Prognostic values	Conclusion	(Ref.)
Bartlett, 2019	Retrospective	1001	65 months	239 myxoid, 216 extremities	perioperative chemotherapy; perioperative radiotherapy	marginal	R0 (91.2%); R1 (7.9%); R2 (0.8%); periop chemo adjuvant 2.9% and neoadjuvant 3.8%; periop radio adjuvant 56.1% and neoadjuvant 34.7%	LR 2.4 (1.2-4.9)	DSD 8.7 (3.7-20.3); DR 17.9 (6.9-46.3); LR 2.4 (1.2-4.9)	age <54 or >54; depth; tumor size	histologic subtype is the factor most strongly associated with DSD, DR and LR	(28)
Beane, 2014	Prospective	141	18 years	141-extremities	postoperative radiotherapy	n/a	70 EBRT	n/a	82% EBRT		no effect on OS, excellent local control acceptable treatment related morbidity	(35)
Callegaro, 2019	Retrospective	3752	79 months	510-myxoid extremities	chemotherapy, radiotherapy	marginal	3165 R0 (84.4%); 587 R1 (15.6%)	263 and 99 patients developed LR, 951 and 482 developed DM, 60 and 180 devloped synchronous LR and distant metastasis, p value significant	11 cm lower survival compared to 4, myxoid higher survival compared to other liposarcoma, 69 years of age lower survival compared to 42 years of age, all p value< 0.0001	positive margins, age, size, grade	individualised treatment is needed in individualised soft tissue sarcoma	(20)
Chowdhry, 2018	Retrospective	85	85 months	74-extremities	radiation 75/85; preoperative 67 (79%); chemo 39/85	wide resection	19 R0; 62R1; 2R2, 2-Preoperative XRT (3%) vs 11% postoperative	19 R0; 62R1; 2R2		size, grade	radiation will induce tumor necrosis with amean of 77%; additional chem will increase it but no benefit on outcome	(57)
Chung, 2009	Prospective	88	86 months	691-extremities, 88-myxoid	preoperative XRT 47%	wide resection	17R1	LR=2/17R1; no LR with 41preop XRT, M=13.6%	OS= 94% 5y vs 76% other STS DFS= 89%	n/a	n/a	(51)
Durr, 2018	Retrospective	43	58 months	41-extremities	XRT:32/43 (11preop), chemotherapy: 22/43	wide resection	31 R0; 12 R1	4 LR (9%) after R1, M=9%	OS=72-81%	age >48, grade, size	radiation therapy decreases the size but did not affect LR	(10)
Eilber, 1997	Retrospective	126	179 months	61-myxoid extremities	ifosfomide; doxorubicin		R0: 107 (85%); R1: 19 (15%)	R0 107 (85%); R1 19 (15%)	5 yr DSS 92%; 5 yr DRFS 81%; 5 yr LRFS 86% compared to 87%	chemo	patients with large, highe grade, primary extremity liposarcoma, If associated with an improved DFS	(48)
Engstrom, 2007	Retrospective	237	44 months	218-extremities	postoperative Radiotherapy	43% marginal, 47% wide	101 R1; 112 R0	101 R1; 112 R0	10 yr local recurrence free and metastasis free survival low grade group 87% and 95% respectively	histologycial type; old age; tumor size; high grade	postoperative radiotherapy decreases the local recurrence rate	(36)
Fiore, 2007	Retrospective	329	119 months	329-extremities	XRT: 128 Patients ( 44 recurrent), chemotherapy: 61 (22 recurrent)	wide resection	128-XRT, 61-Chemotherapy	LR: 13-17.5 %(10y), M=58/329	DSS: 75-83(87-90 in primary)	LR, grade tumor size >10 cm, and surgical margins	>5% round cell component has a higher risk of metastasis and death, size>10cm has a higher risk of death compared to tumors <10cm, negative margins are important for local control	(6)
Le Grange, 2014	Retrospective	68	35 months	59 extremities ; 22 myxoid	preoperative XRT	wide resection and marginal	R0:93%; R1: 7%	tumor volumes reduced in 80% original size	Two year local relapse free survival 87.5%; 2 year OS 74.7%	tumor volume	most of the patints following preoperative radiotherapy showed volume reduction to an extent of surgical resections of borderline tumor	(38)
Greto, 2019	Prospective	186	8.6 years	168 extremities; 99 MLPS	preop 40/186; postop 112/186	81.2% marginal; 3.8% intralesional; 1.6% amputation	preop 21.5%; postop 60.2%	LR 17.2%	LR 17.2%; 5 year DFS-LR 90.5% age <65 and 66.1% age >65; DFMS 83.1% age<65 and 74.6% age >65; 5-yr OS 61.8% age >65 and 88.7% age <65; DSS 91% female and 57.4% male	age >65, tumor depth, and grading	preoperative radiotherapy resulted in a statistically better disease specific survival than postoperative radiotherapy	(14)
Gronchi, 2019	Prospective	14	n/a	extremities	preoperative therapy, XRT 14/14; postoperative XRT 5/14	wide resection	7 R0; 5 R1	RECIST: 5 PR(36%0, 8 SD(57%), 1 distant PD(7%); CHOI: 12 PR(86%), 1SD(7%), 1 distant PD(7%)	3-yr RFS, DFS and OS are 92%, 86% and 93% respectively	age between 18 to 70; depth: deep; grade -1 (79%);	median viable residual tumor was 5 %(0-60)	(42)
Gronchi, 2020	RCT	12	26 months	extremities	chemotherapy+XRT	wide12/14	7R0, 5R1		RFS, DFS and OS at 3-yr were 92% (95%CI: 76–100), 86% (95%CI: 67–100) and 93% (95%CI: 79–100)	n/a	chemotherapy + XRT showed favorable outcomes in MLPS	(72)
Guadagnolo, 2008	Retrospective	127	9.1 years	109 extremities	radiation preoperative 46%, postoperative 54%, chemotherapy 28%	wide resection	127 patients underwent surgery, 46% underwent preoperative XRT, 54% underwent postoperative radiotherapy, 28% received doxcurubicine chemotherapy	4/127 LR; M=15-24%	OS= 72-87% DFS= 73-81%	no risk factors including age,size or chemo	conservative surgery and radiotherapy is excellent for localised liposarcoma	(39)
Haniball, 2011	Retrospective	160	n/a	155 extremities	postoperative radiotherapy (usually 60 Gy) 67% (>5 cm), deep tumors with R1)	wide resection	55R0, 86 R1; 19R2	LR19/160 (12%); Risk 32%R2; 6% R1, and 14% R0 Radiation did not reduce incidence of LR in R1-2 10%, M=32%	OS= 56-69%	grade	5% Round cell component should be considered for adjuvant radiotherapy and chemotherapy	(4)
Hatano, 2003	Retrospective	12	58.1 months	12-MLS	conservative XRT postoperative	8 tumors marginal, 4 tumors intralesional	8R1; 4R2	No LR at 5y	n/a	n/a	marginal or intralesional accompanied with postoperative XRT can achieve high rate of local control	(58)
Hoffman, 2013	Retrospective	207	68 months	153	chemotherapy, pre- and postoperative radiotherapy	marginal, wide resection	156 R0, 25 R1, 8 R2	156 R0 25 R1 8 R2	5 and 10 year disease specific survival rates among patients with localized disease 93% and 87%; LR 7.4%	male gender; receptor tyrosine kinase encoded by AXL gene	tumors with a round cell phenotype expressed increased levels of CXCR4, p53, adipophilin, PDGFR-B, PDGFR-ALPHA, and vascular endothelial growth factor relative to myxoid phenotype	(5)
Kilpatrick, 1996	Retrospective	95	5.9 years	91 extremities	n/a	n/a	95 patients	M=35%, 31% died	n/a	age > 45 years, percent of round cell differentiation > or = 25%, and the presence of spontaneous tumor necrosis	age>45 years and round cell component >25%, presence of tumor necrosis leads to poor suvival in MLPS patients, tumor size >10cm associated with adverse clinical outcomes only in univariate analysis	(15)
Kim, 2009	Retrospective	94	48 months	33 extremities; 22 myxoid	Post operative Radiotherapy	marginal, wide resection	R0 50; R1 32; R2 12	n/a	5 yr OS 100%; 1 year DFS 92.9%	margin status; histologic subtype	adjuvant radiotherapy confer survival benefit in low grade tumors more than high grade	(77)
Knebel, 2017	Retrospective	133	15 years	extremities+trunk,40 myxoid	XRT 55 + chemotherapy 18	surgical resection in 128	R0 67, 44R1, 12R2	8/40 LR for 21% tumor entity, 21/40 for 56% tumor entity	The survival rates of patients with clear margins were 100%, 84.3% and 67% after 1, 5, and 10 years. On the other hand, if positive margins were only microscopically detected, the corresponding survival rates were 97.7%, 81.9%, and 75.6%. Additionally, if a macroscopically tumour was left in place, the respective survival rates were 100%, 75.0% and 31.3%	grade, margins, metastasis and tumor size	grading, LS subtype, negative margins after surgery, metastases and tumour size are independently associated with disease-specific survival, and patients with local recurrence had lower survival rates	(37)
Lansu, 2021	Non-randomized CT	79	n/a	extremities + trunk	50-Gy dose preop XRT vs 36-Gy dose preop xrt	surgical resection 4 weeks post xrt	n/a	n/a	n/a	n/a	deintensification of preoperative radiotherapy dose is effective and oncologically safe and is associated with less morbidity than historical controls	(13)
Lazarev, 2017	Retrospective	9604	6.9 years	6430 extremities; 753 myxoid	preoperative XRT, postoperative XRT	n/a	34% preop; 66% postop	n/a	5 year overall survival is 65.4 and 71.3% for preoperative and postoperative respectively.	xrt	postoperative radiotherapy used more often than preoperative; preoperative use has been increasing in last few years	(64)
Lemeur, 2015	Retrospective	20	55.9 months	20-extremities	chemotherapy for metatstaic lesions, radiotherapy for R1	wide, marginal, radical	3R1, 6R0, 5-radical	LR: 8 cases M=3 patients	Survival 90% with a maximum follow ups of 8 years	n/a	threshold between intermediate and high grade is 5% round cell	(27)
Moreau, 2012	Retrospective	418	5.2 years	406 extremities	308 (170 preoperatively) XRT, 25/418 Chemotherapy	wide resection	R0 309 (73.9%), R1 92 cases (22%), R2 14 (3.3%)	LR:31 (7.4%), Margins - LR with XRT3.1% (7/225)vs 5.2% (4/77) No XRT; Margins + : LR 9.7% (7/72) XRT vs 37.9% (11/29), M=20%	The 5-year local recurrence-free rates were 82% with surgery alone and 96% with the addition of radiotherapy. 5 year metastasis-freesurvival: 84% in MLS and69% inRCLS	age > 45; Round cell percent (5%) and tumor diameter (10 cm)	tumor diameter before and after neoadjuvant radiotherapy was collected in 121 patients and showed a median reduction of 18% in diameter	(3)
Nishida, 2010	Retrospective	53	6 months	40 extremities	9/53 XRT	wide resection	4R0;2R1;1U 2/9=22% XRT vs 5/44= 11% no XRT	LR=7/53=13%, M=11%	OS= 83-90% DFS= 77%	age >60	local control in pure myxoid can be achieved by wide resection without XRT. Age has lower survival, size, and depth	(12)
Osullivian, 2001	RCT	190	6.9 years	extremities	preop and postop EBRT	n/a	n/a	n/a	Pre-op vs post-op respectively were, local control: 93% vs 92%; metastatic-relapse free: 67% vs 69%; recurrence-free survival: 58% vs 59%; overall survival: 73% vs 67% (P=0.48); cause specific survival: 78% vs. 73% (P=0.64).	positive margins, age, size, grade	preoperative and postoperative EBRT are equally effective in achieving control and survival in extremity STS, anatomic site should be considered in the choice of EBRT approach.	(66)
Pisters, 1996	RCT	164	76 months	extremities+trunk	brachytherapy	n/a	n/a	local control rates were 82% and 69% in the BRT and no BRT groups (P =0 .04), respectively. Patients with high-grade lesions had local control rates of 89% (BRT) and 66% (no BRT) (P = 0.0025). BRT had no impact on local control in patients with low-grade lesions (P =0 .49).	The 5-year disease-specific survival rates for the BRT and no BRT groups were 84% and 81% (P = 0.65), respectively, with no impact of BRT regardless of tumor grade.	histolgical grade had no impact on BRT for the development of metastasis	adjuvant brachytherapy improves local control after complete resection of soft tissue sarcomas. This improvement in local control is limited to patients with high-grade histopathology. The reduction in local recurrence in patients with high-grade lesions is not associated with a significant reduction in distant metastasis or improvement in disease-specific survival.	(30)
Roberge, 2010	Retrospective	50	n/a	35 extremities; 7 myxoid low grade	preoperative XRT, postoperative XRT	n/a	n/a	82.1% median decrease tumor volume	n/a	grade	responses in the form of hyaline fibrosis, necrosis, and granulation tissue	(61)
Rosenberg, 1982	Prospective	43	653 days	extremities	limb sparing + adjuvant XRT+chemotherapy	wide	n/a	out of 4 LPS , 1 LR, 1 DR, 1 death	n/a	positive margins	limb sparing + XRT+ chemotherapy improves significantly overall and disease free survival in high grade tumors	(50)
Salduz, 2017	Retrospective	23	62 months	extremities	preoperative XRT, chemotherapy 8/23	wide resection and marginal	R0 19; R1 4	LR 1/23 (R0), M=26%	OS=71-78%	size >15cm, Ro	initial diagnostic biopsy samples revealed round cell components in 8 (34.8%) cases, round cells were observed in the excision specimens of only 5 cases (21.7%).	(46)
Skorpil, 2017	Case-series	2	n/a	extremities	preoperative XRT	n/a	n/a	n/a	n/a	tumor size	tumor size affects prognosis	(54)
Smith, 1996	Retrospective	29	n/a	extremities	n/a	n/a	n/a	n/a	n/a	round cell >5 %	>5% round cell component has a higher risk of metastasis, unequivocal round cell should be designated as high grade	(19)
ten-Heuval, 2007	Retrospective	49	101 months	42 extremities	24/49 XRT	wide resection	37 R0 (18XRT) 12 R1 (6XRT)	LR= 16/49=33% (Ext 10/42=24%) (NE 6/7=86%) Ext:R0: 7/34: 21%--R1: 3/8:38% 2/24 xrt:8 % 8/18 no XRT:44%	DSS= 72-85%	age>45 grade size>5cm	age, tumor grade, size have a negative influence on survival by univariate analysis and great by multivariate analysis	(17)
Vos, 2018	Retrospective	456	n/a	172 myxoid extremities	(neo)adjuvant radiotherapy, chemotherapy	marginal	286 R0 (62.5 %); 129 R1/R2 (28.3%); preop radio 36.8%; preop chemo 1.1%; postop radio 18%; postop chemo 0.2%	LR (84.5%); DM (74%)	5Y OS( 79.7%)	male gender; histology	extremity LPS is not a single entity	(44)
Wu, 2019	Retrospective	1756	n/a	extremities	50% XRT	wide resection	n/a		CSS=85-90%; OS=76-86%	age > 30, gender male, tumor grade, year of diagnosis > 2000, and tumor size > 10	age, gender, tumor grade, year of diagnosis, tumor size are indepedant prognostic factors for OS and cancer specific survival for extremity MLS.	(11)
Yang, 1998	Randomized prospective	91	9.6 years	extremities	post operative radiotherapy	LSS	n/a	significant decrease in LR with patients undergone XRT compared to no XRT in high grade and low grade tumors	No difference in survival for both low grade and high grade when comparing patients who took post op radio and didn’t take post op radio	n/a	postoperative external-beam radiotherapy is highly effective in preventing LRs, selected patients with extremity soft tissue sarcoma who have a low risk of LR may not require adjuvant XRT after LSS	(29)
Zheng, 2019	Retrospective	34	65	extremities	n/a	wide resection	11R0, 23 R1	LR= 14/34 (all R1: 61%), M=7/14 of LR; M=1/20 No LR	n/a	size,LR,R0	wide resection achieved local control, larger diameters 1.7cm more difficult to be submitted to wide resection.	(7)
